# Supplementary material for: Bioinspired polydopamine-induced assembly of ultrafine Fe(OH)3 nanoparticles on halloysite toward highly efficient fire retardancy of epoxy resin via an action of interfacial catalysis
Source: Royal Society of Chemistry journal article supplement (doi:10.1039/c7py00660h), 2017-01-01
Supplement: c7py00660h1.pdf [file c7py00660h1.pdf]

**Bioinspired Polydopamine Induced Assembly of Ultrafine Fe(OH)<sub>3</sub>  
Nanoparticles on Halloysite toward Highly Efficient Fire Retardancy  
of Epoxy Resin via An Action of Interfacial Catalysis**

Zhi Li<sup>a</sup>, Lejing Liu<sup>a,b</sup>, Alejandro Jiménez González<sup>a,c</sup>, De-Yi Wang<sup>a\*</sup>

<sup>a</sup> *IMDEA Materials Institute, C/Eric Kandel, 2, 28906 Getafe, Madrid, Spain*

<sup>b</sup> *Material Science and Engineering College, Tongji University, 4800 Caoan Road, Shanghai, 201804,  
P.R.China*

<sup>c</sup> *Escuela Superior de Ciencias Experimentales y Tecnología (ESCET), Universidad Rey Juan Carlos,  
C/Tulipán, s/n, 28933 Móstoles, Madrid, Spain*

\*Corresponding author. Tel: +34 917871888

*Email address: deyi.wang@imdea.org*

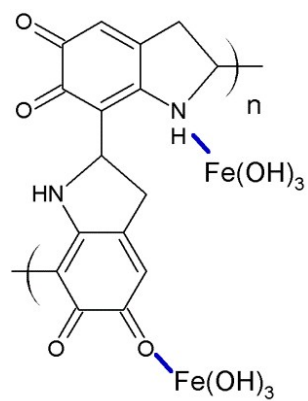

**Scheme S1.** The interaction between PDA molecule and  $\text{Fe}(\text{OH})_3$

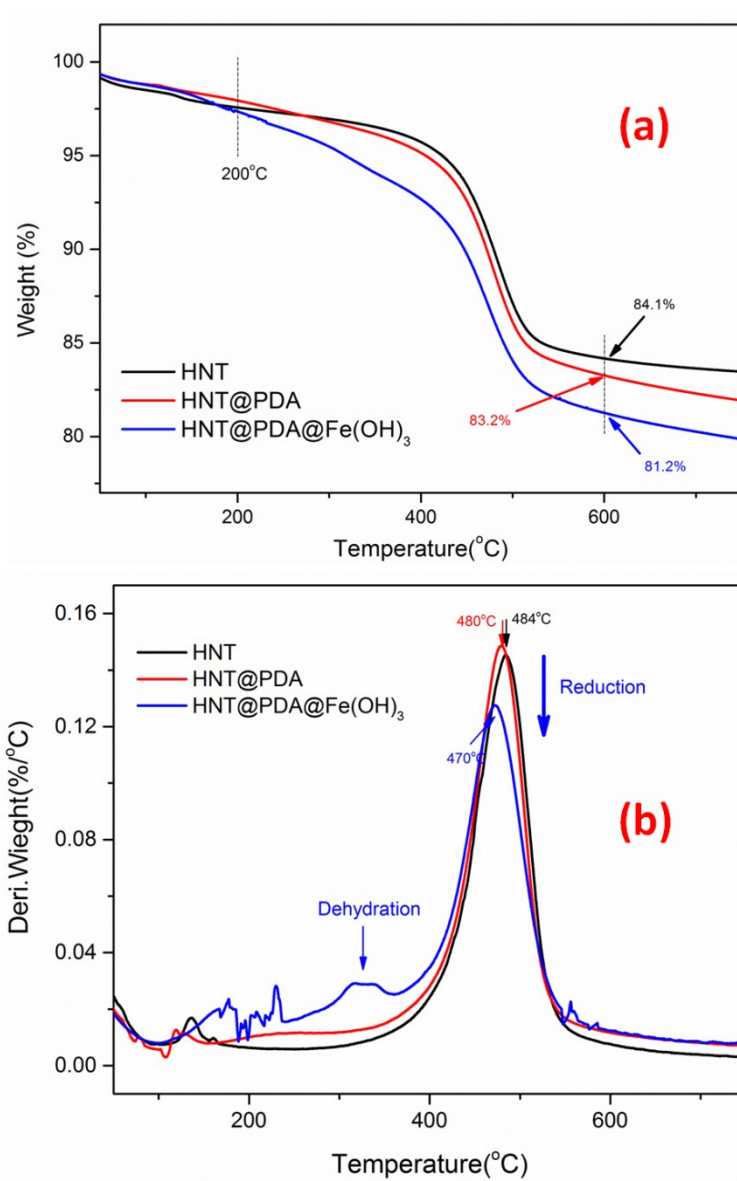

**Fig S1.** (a) TG and (b) DTG curves of HNT, HNT@PDA and HNT@PDA@ $\text{Fe}(\text{OH})_3$

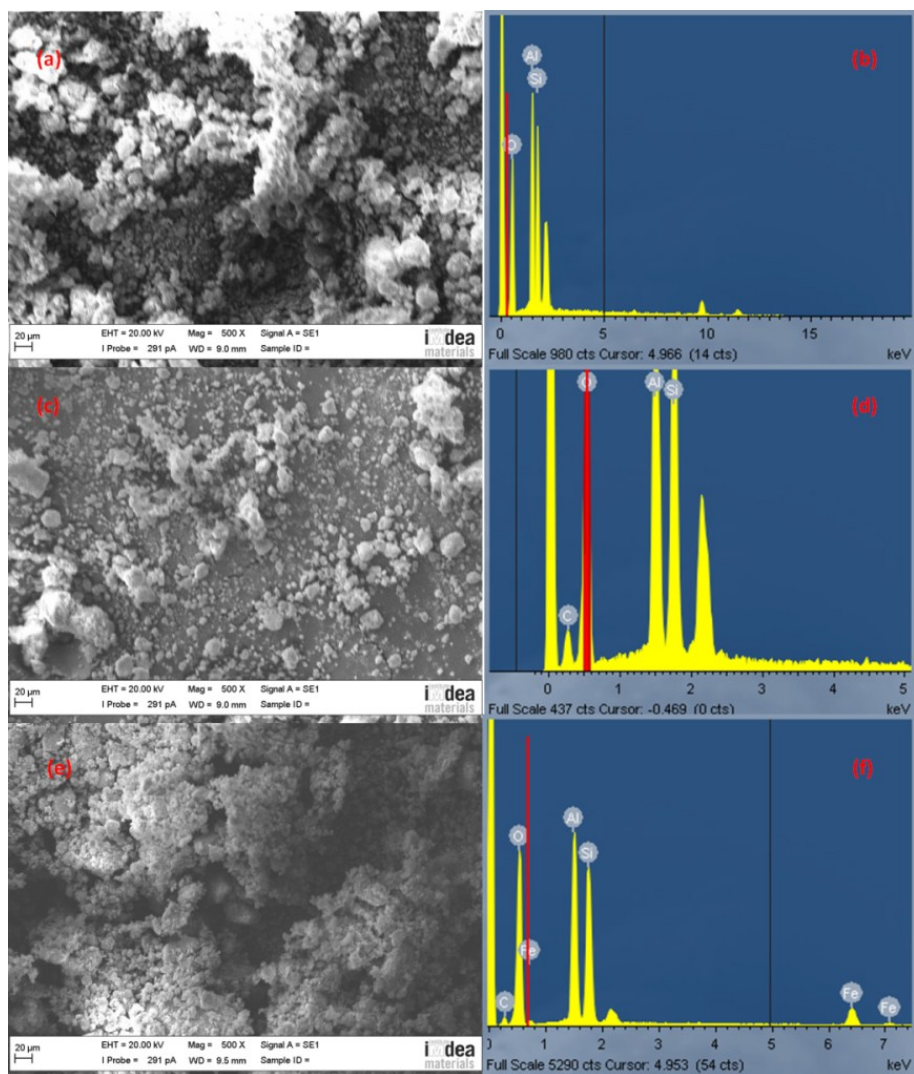

**Fig S2.** SEM images and EDS results of HNT (a, b), HNT@PDA (c, d) and HNT@PDA@Fe(OH)<sub>3</sub> (e, f)

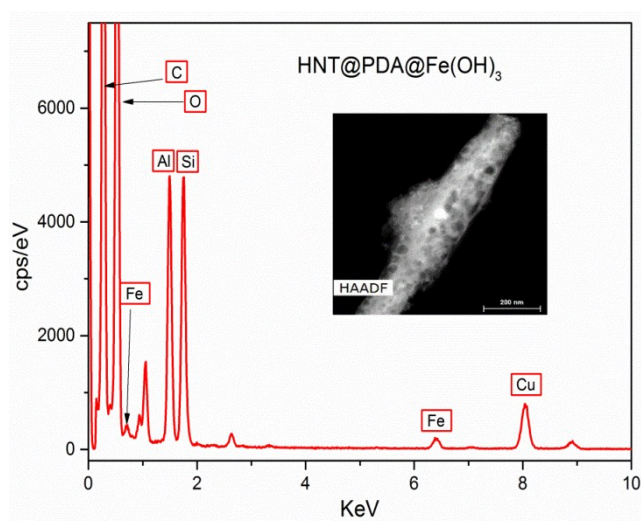

**Fig S3.** EDS spectra of HNT@PDA@Fe(OH)<sub>3</sub>

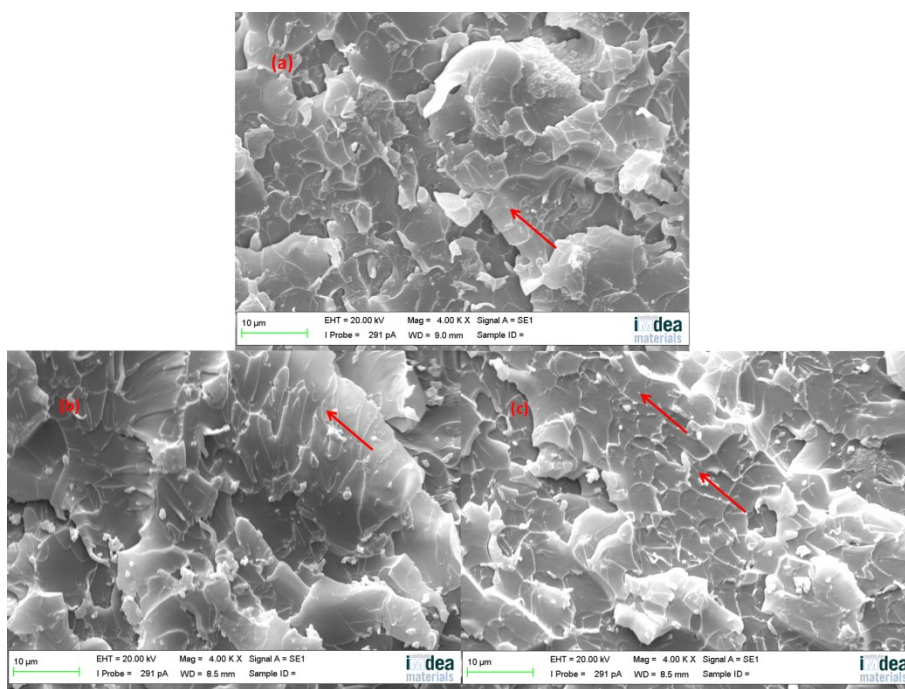

**Fig S4.** (a) SEM images of fracture surface of EP/5HNT, EP/5HNT@PDA and EP/5HNT@PDA@Fe(OH)<sub>3</sub> (red arrow marked HNT and its derivations)

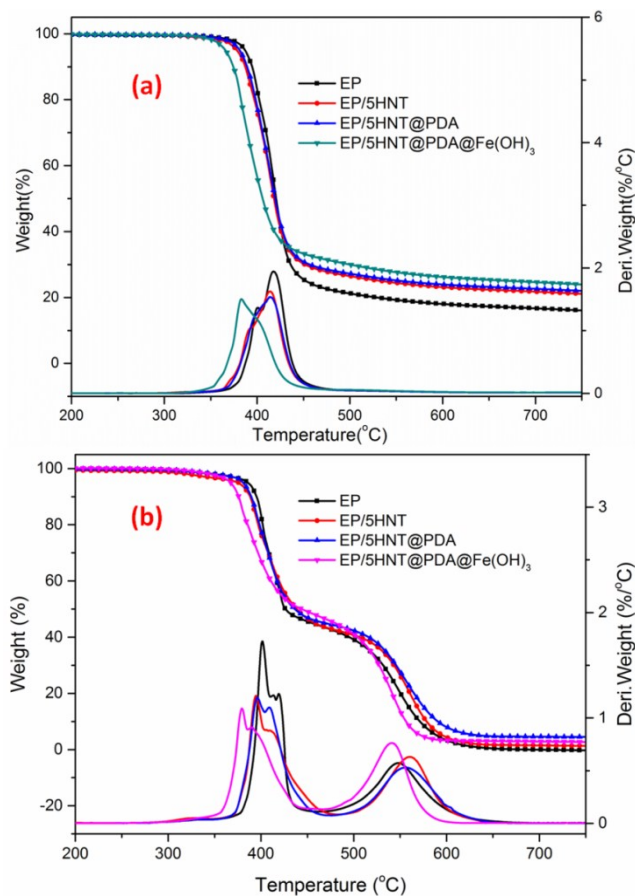

**Fig S5.** TG and DTG curves of EP, EP/5HNT, EP/5HNT@PDA and EP/5HNT@PDA@Fe(OH)<sub>3</sub>

EP/5HNT@PDA@Fe(OH)<sub>3</sub> at (a) N<sub>2</sub> and (b) air atmosphere

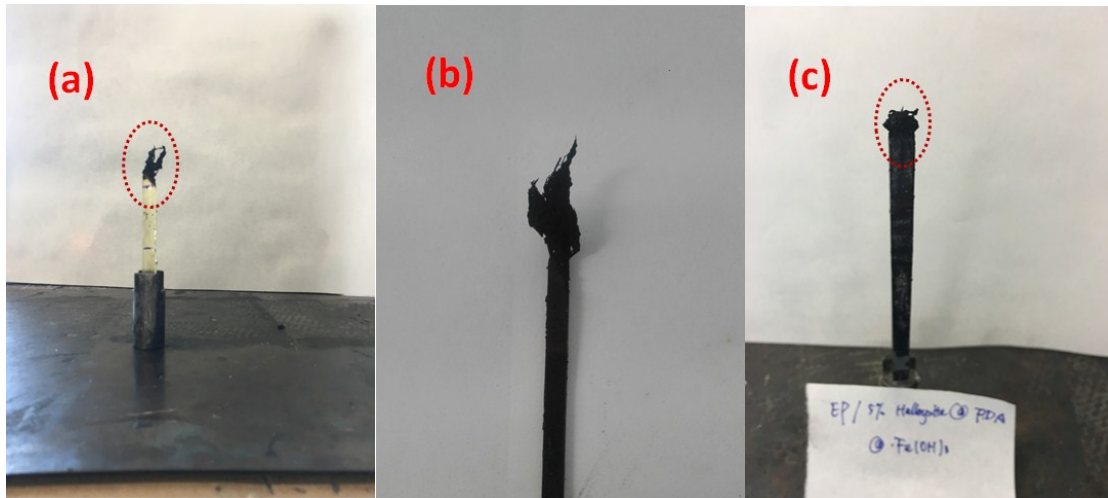

**Fig S6.** Char of (a) EP, (b) EP/5HNT@PDA-Fe(OH)<sub>3</sub> and EP/5HNT@PDA@Fe(OH)<sub>3</sub> after LOI test

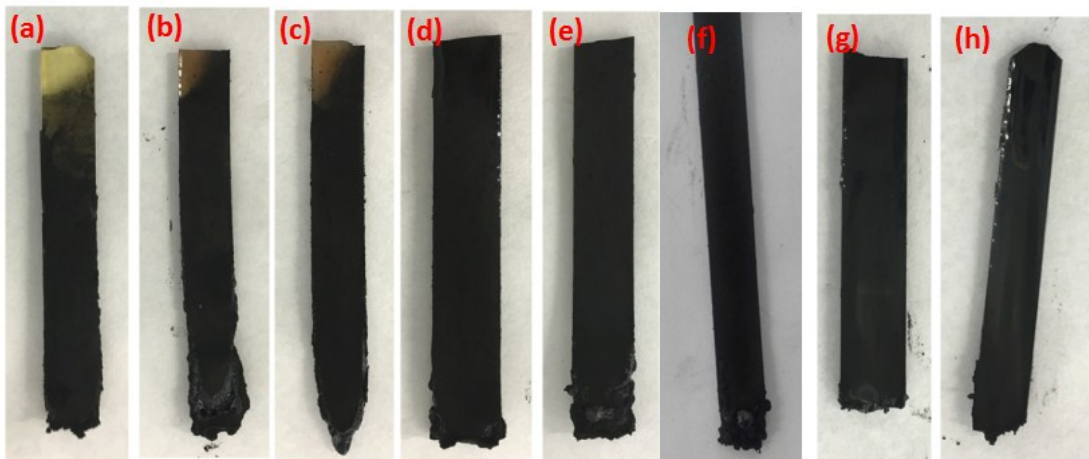

**Fig S7.** Char of (a) EP, (b) EP/5HNT, (c) EP/10HNT, (d) EP/5HNT@PDA, (e) EP/10HNT@PDA, (f) EP/5HNT@PDA-Fe(OH)<sub>3</sub>, (g) EP/5HNT@PDA@Fe(OH)<sub>3</sub> and (h) EP/10HNT@PDA@Fe(OH)<sub>3</sub> in UL-94 test

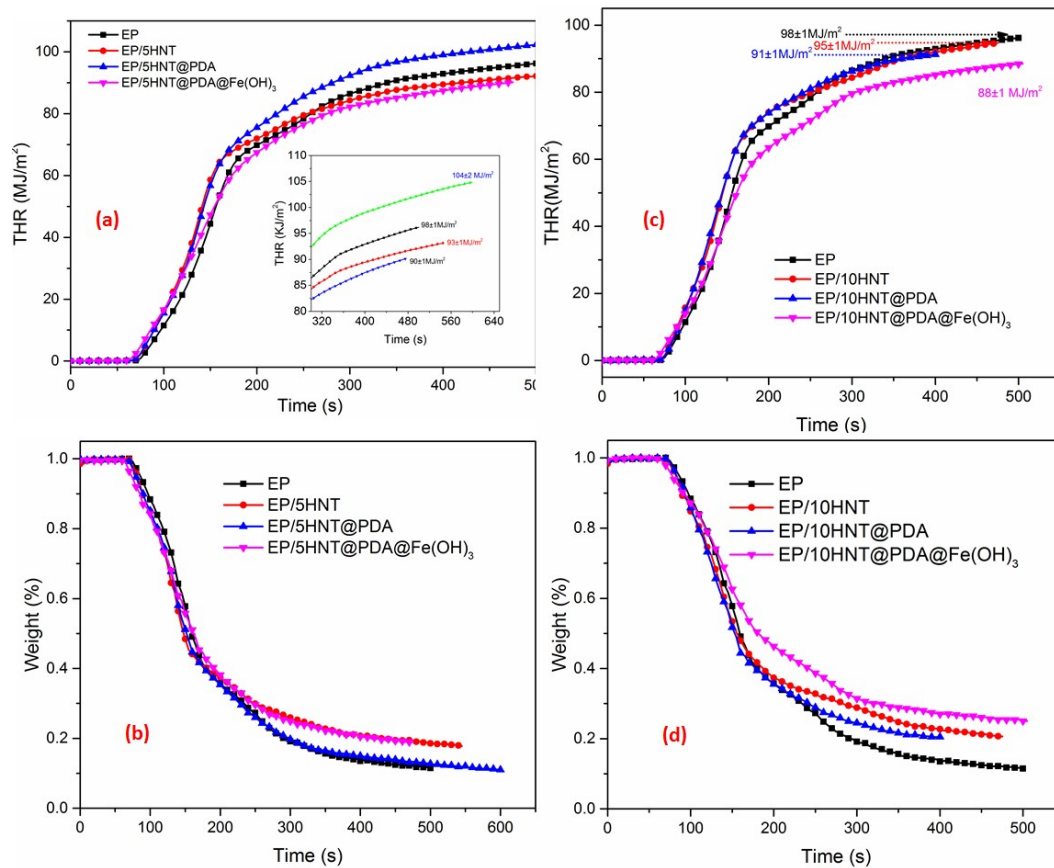

**Fig S8.** HRR curves of EP and EP nanocomposites with (a) 5wt% HNT and its derivations and (c) 10wt% HNT and its derivations; Weight curves of EP and EP nanocomposites with (b) 5wt% HNT and its derivations and (d) 10wt% HNT and its derivations

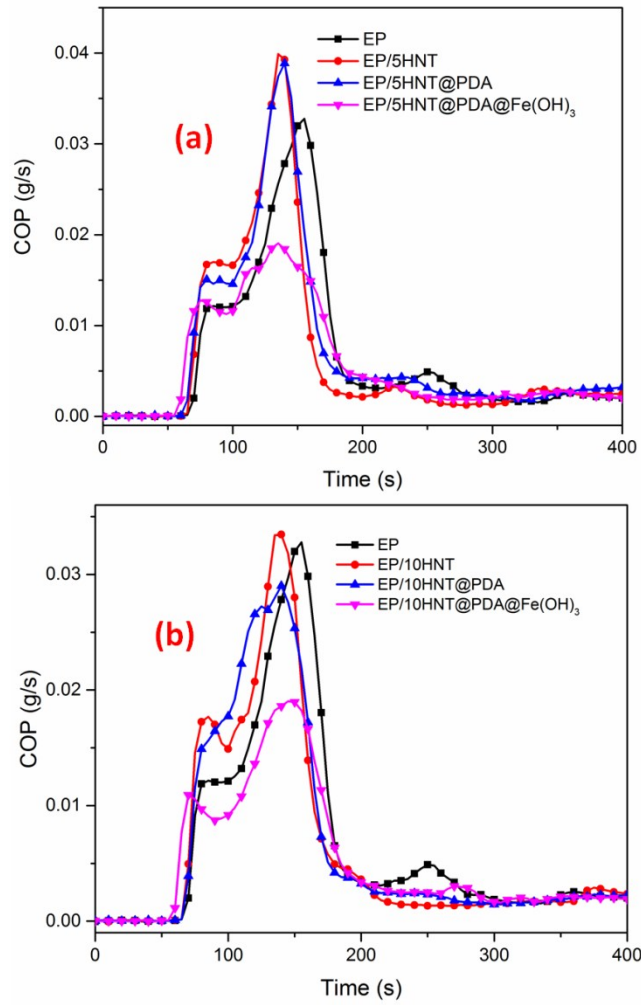

**Fig S9.** COP curves of EP and EP nanocomposites with HNT, HNT@PDA and HNT@PDA@Fe(OH)<sub>3</sub> at (a) 5wt% and (b) 10wt% loading

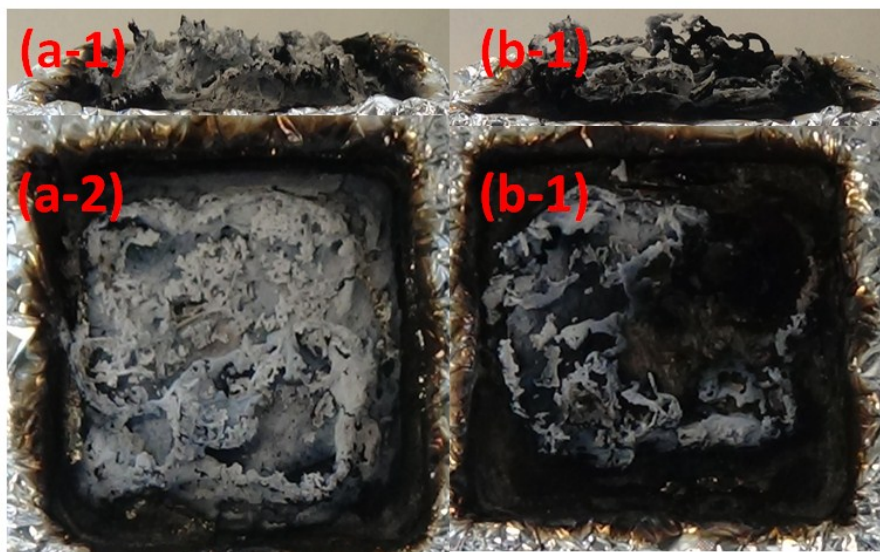

**Fig S10.** Digital images of chars of EP/10HNT from top (a-1) and front (a-2) view

and (b) from top (b-1) and front (b-2) view

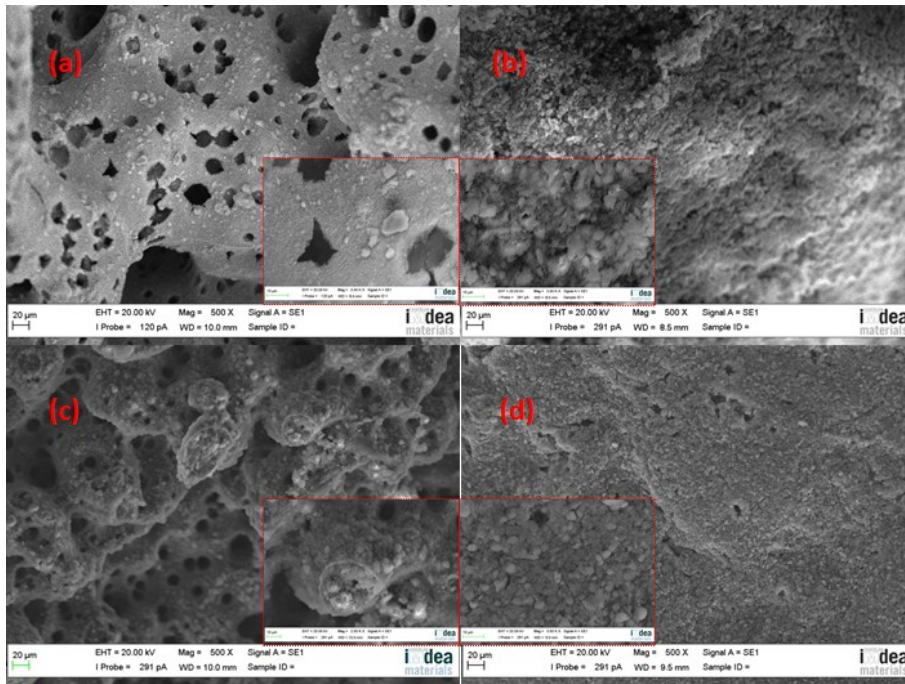

**Fig S11.** SEM images of interior and exterior char of (a) (b) EP/10HNT and (c) (d) EP/10HNT@PDA

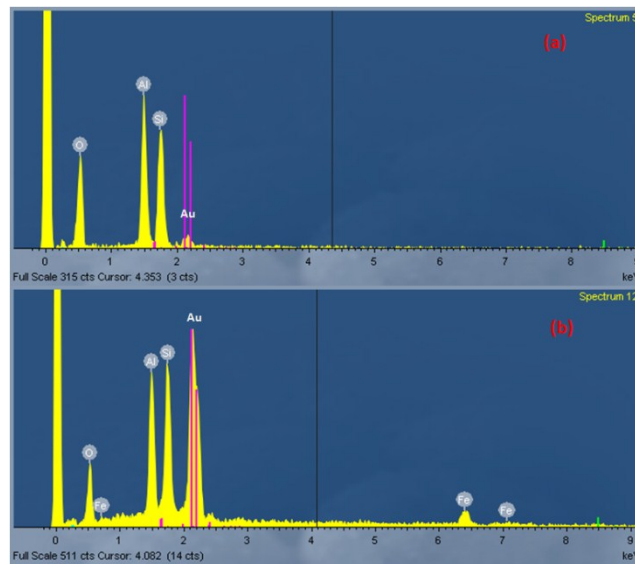

**Fig S12.** EDS spectra of char from (a) EP/10HNT and (b) EP/10HNT@PDA@Fe(OH)<sub>3</sub>



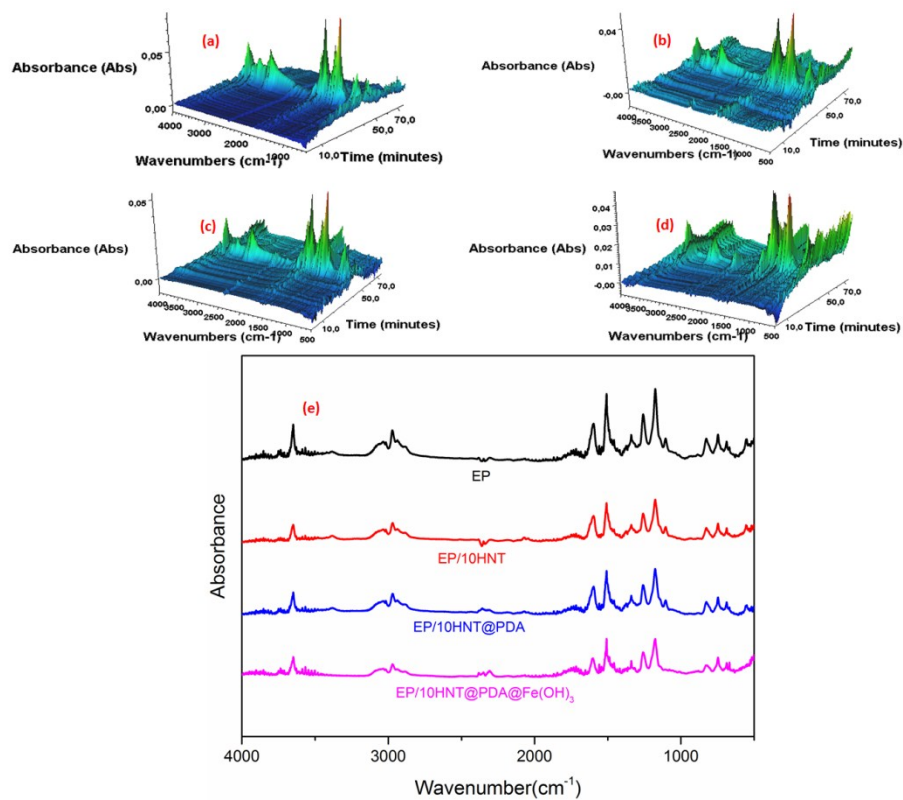

**Fig S13.** 3D diagrams of volatiles evolution of (a) EP, (b) EP/10HNT, (c) EP/10HNT@PDA and (d) EP/10HNT@PDA@Fe(OH)<sub>3</sub> in TG-FTIR measurement and (e) FTIR spectrum at maximum degradation rate

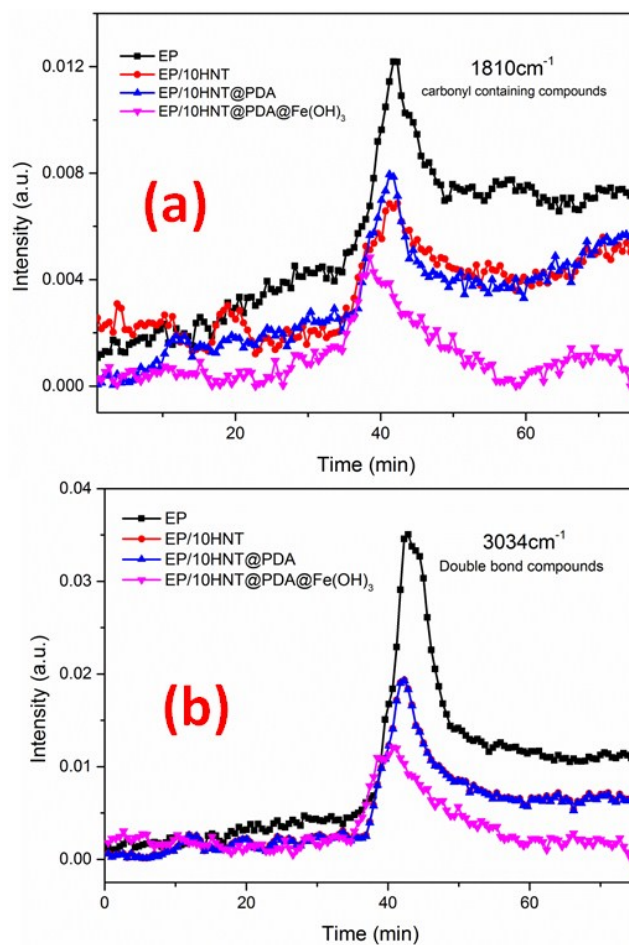

**Fig S14.** (a) Carbonyl compounds and double bonds compounds evolutions of EP and EP nanocomposite

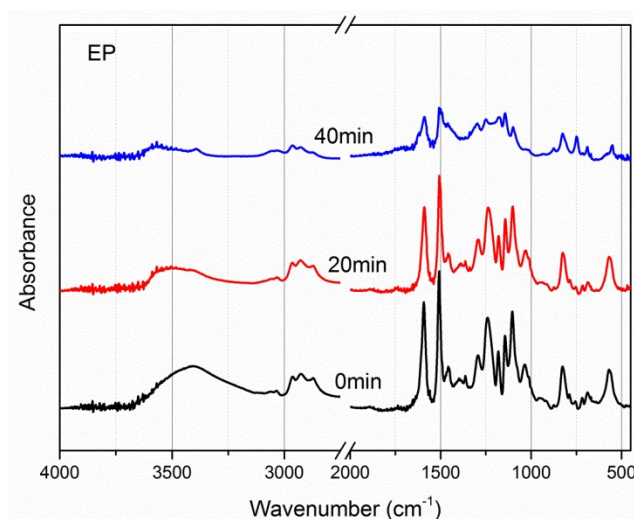

**Fig S15.** vt-FTIR spectra of EP at 0min, 20min and 40min

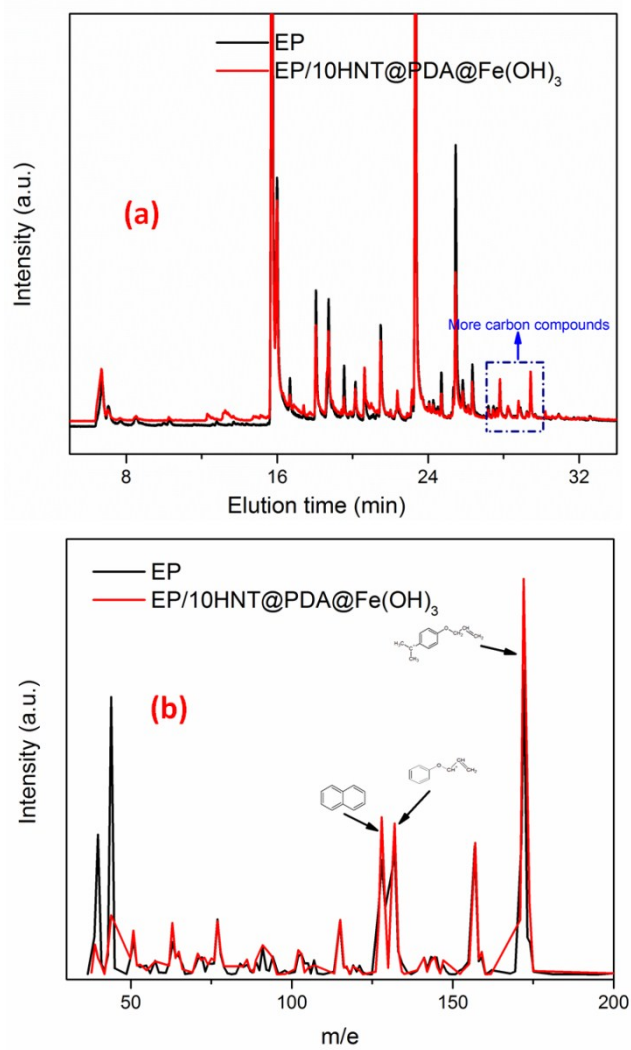

**Fig S16.** (a) GC curves of EP and EP/10HNT@PDA@Fe(OH)<sub>3</sub> at the maximum total ion current; (b) Mass spectroscopy at elution time of 29.44min
